# Supplementary material
Source: Springer Nature journal article supplement (https://mijn.bsl.nl/resource/supplementary/13047_2010_121_MOESM2_ESM.pdf/7109918)

Consecutive patients with RA who were about to start anti-TNF therapy were recruited between February 2005–June 2007

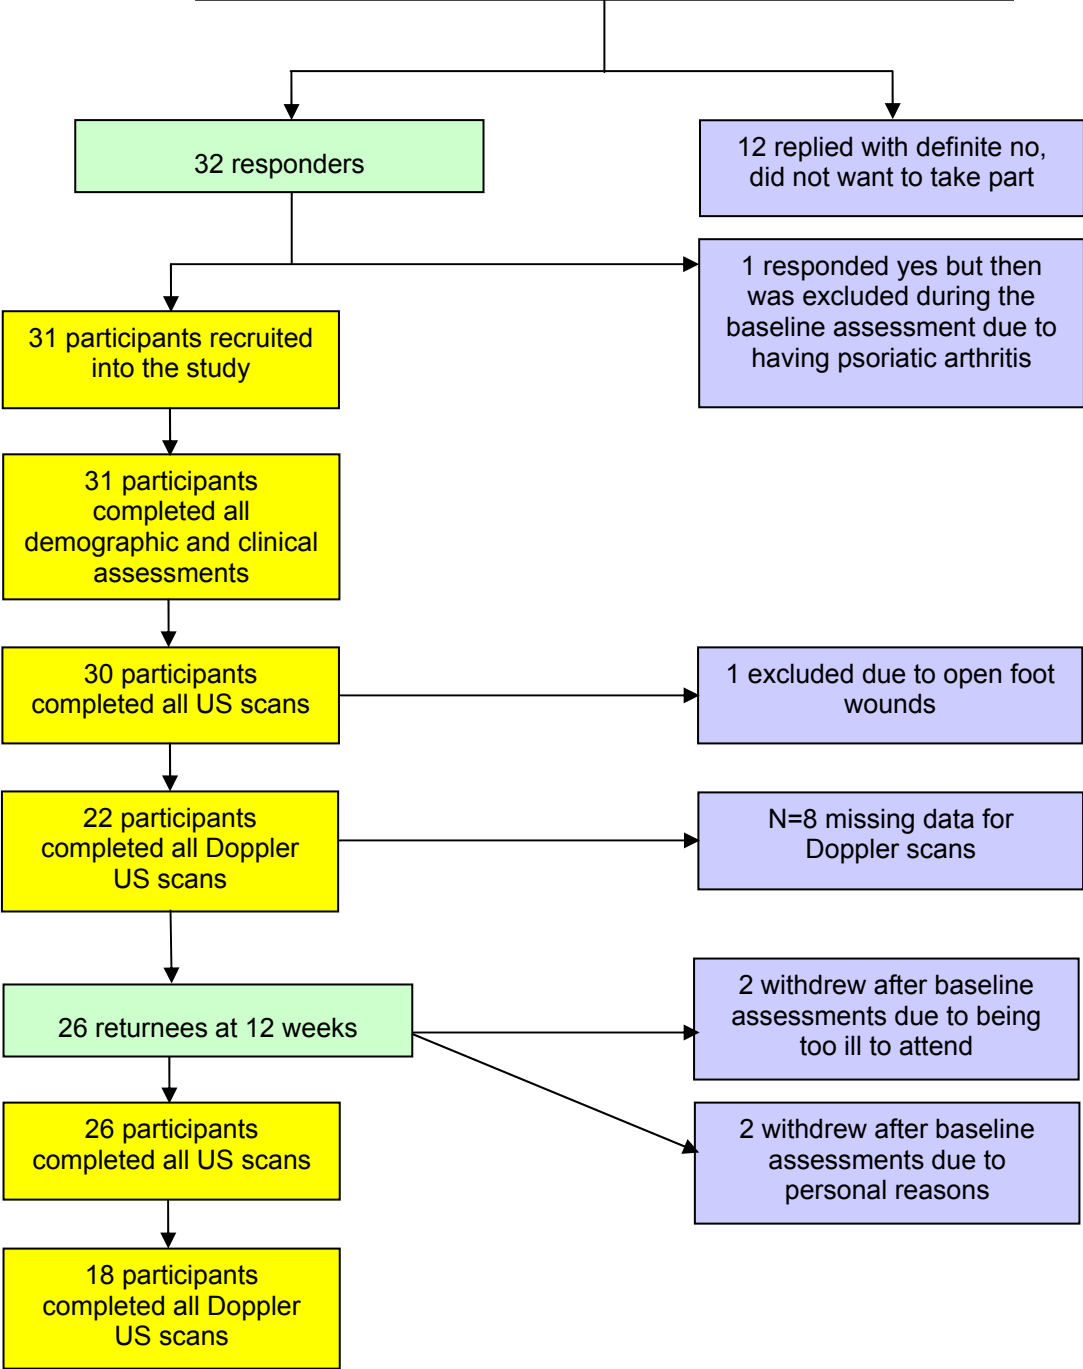

Supplement: MOESM2 [file 7109918]
